# Supplementary material
Source: PubMed Central journal article supplement (PMC6927470)
Supplement: NIHMS1062642-supplement-SI.pdf [file NIHMS1062642-supplement-SI.pdf]

## **Supporting Information**

### **Strategies for Enhancing the Rate Constant of C–H Bond Cleavage by Concerted Proton-Coupled Electron Transfer**

Elvira R. Sayfutyarova, Yan Choi Lam, and Sharon Hammes-Schiffer\*  
Department of Chemistry, Yale University, 225 Prospect Street, New Haven, Connecticut 06520

\*Corresponding author email: [sharon.hammes-schiffer@yale.edu](mailto:sharon.hammes-schiffer@yale.edu)

## Table of Contents

|                                                                                      |     |
|--------------------------------------------------------------------------------------|-----|
| Optimized structures for the studied species .....                                   | S3  |
| Reactant and product structures for a range of proton donor-acceptor distances ..... | S4  |
| Average structures .....                                                             | S5  |
| Proton potentials .....                                                              | S6  |
| Probability distribution function for proton donor-acceptor distance.....            | S8  |
| Total reorganization energy .....                                                    | S8  |
| Change in the free energy due to the substituents.....                               | S11 |
| Dominant proton donor-acceptor distance.....                                         | S12 |
| Calculated rate constants.....                                                       | S15 |
| Linear Relationship between $\Delta G^0$ and the Hammett Constant $\sigma$ .....     | S16 |
| Calculated Brønsted $\alpha$ .....                                                   | S17 |
| Cartesian coordinates of optimized equilibrium structures .....                      | S19 |
| References.....                                                                      | S27 |

## Optimized structures for the studied species

We optimized the geometries of the reactant and product using unrestricted density functional theory (DFT) with the B3LYP<sup>1-2</sup> functional and the 6-31+G\*\*<sup>3-5</sup> basis set with the Gaussian 09 program.<sup>6</sup> The structures were optimized in solution (acetonitrile) using the conductor-like polarizable continuum model (CPCM).<sup>7</sup> Table S1 contains the optimized equilibrium proton donor-acceptor C–O distances for the reactant and product states of each molecule. Tables S13-S20 provide the optimized Cartesian coordinates for both the reactant and product structures for the fluorenyl-benzoates studied.

**Table S1. Equilibrium and Average Proton Donor-Acceptor Distances from Optimized Reactant and Product States (in Å)**

| <b>Substituent X</b> | <b>Reactant</b> | <b>Product</b> | <b>Average</b> |
|----------------------|-----------------|----------------|----------------|
| NH <sub>2</sub>      | 2.957           | 2.928          | 2.942          |
| OMe                  | 2.968           | 2.943          | 2.955          |
| H                    | 3.029           | 2.972          | 3.000          |
| CF <sub>3</sub>      | 3.069           | 2.993          | 3.031          |

## Reactant and product structures for a range of proton donor-acceptor distances

The total rate constant  $k_{\text{PCET}}$  is obtained by calculating the rate constants  $k(R)$  for a range of proton donor-acceptor distances  $R$  and integrating over  $R$ , weighting each value by the probability distribution function  $P(R)$ . The calculation of the rate constant  $k(R)$  at a given proton donor-acceptor distance  $R$  requires geometries for both the reactant and product states with the same  $R$ . Thus, for each molecule we first optimized both the reactant and product structures while constraining the proton donor-acceptor distance  $R$  to the average equilibrium distance  $R_{\text{av}}$ , as obtained by averaging the equilibrium proton donor-acceptor distances  $R$  for the reactant and product structures (Table S1). Then for each molecule we performed a series of such constrained geometry optimizations for the reactant and product states for a range of  $R$ , varying its value with a 0.05 Å increment/decrement starting from this average distance  $R_{\text{av}}$ .

We generated reactant and product structures for  $R$  ranging from 2.400 Å to 3.400 Å for (o-Flr)(p-H)C<sub>6</sub>H<sub>3</sub>COO<sup>-</sup>, 2.431 Å to 3.431 Å for (o-Flr)(p-CF<sub>3</sub>)C<sub>6</sub>H<sub>3</sub>COO<sup>-</sup>, 2.355 Å to 3.355 Å for (o-Flr)(p-OMe)C<sub>6</sub>H<sub>3</sub>COO<sup>-</sup>, and 2.342 Å to 3.342 Å for (o-Flr)(p-NH<sub>2</sub>)C<sub>6</sub>H<sub>3</sub>COO<sup>-</sup> (i.e., spanning the range from -0.6 Å to 0.4 Å from  $R_{\text{av}}$  for each molecule). The computed electronic energies for the reactant and product states for all molecules are depicted in Figure S1.

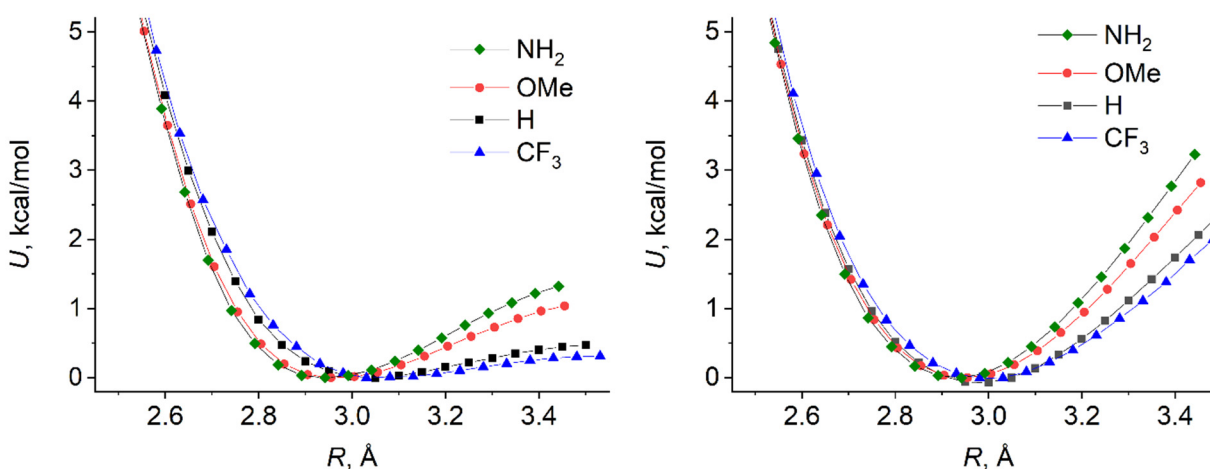

**Figure S1.** Electronic energies of geometries obtained from constrained geometry optimizations with the proton donor-acceptor distance  $R$  constrained for the reactant (left) and product (right) states. The calculations were performed with DFT/B3LYP/6-31++G\*\* in acetonitrile.

## Average structures

The calculation of the proton potentials at a given  $R$  should be performed for a structure corresponding to the crossing point between the reactant and product states of a given molecule along an inner-sphere solute coordinate. We model this structure as an intermediate structure between the reactant and product structures. Because the reactant and the product have significantly different geometries due to the change of hybridization of the donor carbon atom from  $sp^3$  to  $sp^2$ , we used internal coordinates to average the reactant and product structures for each  $R$ . The algorithm to generate an average structure for a given proton donor-acceptor distance  $R$  can be described as follows. The positions of the donor and acceptor atoms were fixed at  $(0,0,0)$  and  $(0,0,R)$ , respectively, for both the reactant and product structures, ensuring that the donor carbon and acceptor oxygen are in identical positions for both structures. The positions of the other atoms were defined using the averaged internal coordinates corresponding to bond lengths, angles, and dihedrals obtained for the optimized reactant and product structures at each  $R$ .

## Proton potentials

For each average structure at a given proton donor-acceptor distance  $R$ , we performed additional constrained geometry optimizations with all atoms except the transferring proton fixed to find the optimized position of the hydrogen on the donor (for the reactant state) and on the acceptor (for the product state). The one-dimensional proton coordinate axis was defined to be the line connecting these two optimized positions of the proton at a given proton donor-acceptor distance  $R$ . Then single-point DFT energy calculations were performed along this axis to obtain the proton potentials. Proton potentials were generated for  $R$  ranging from 2.400 Å to 3.400 Å for (o-Flr)(p-H)C<sub>6</sub>H<sub>3</sub>COO<sup>-</sup>, 2.431 Å to 3.431 Å for (o-Flr)(p-CF<sub>3</sub>)C<sub>6</sub>H<sub>3</sub>COO<sup>-</sup>, 2.355 Å to 3.355 Å for (o-Flr)(p-OMe)C<sub>6</sub>H<sub>3</sub>COO<sup>-</sup>, and 2.342 Å to 3.342 Å for (o-Flr)(p-NH<sub>2</sub>)C<sub>6</sub>H<sub>3</sub>COO<sup>-</sup>. Figures S2 and S3 depict ten pairs of proton potentials for  $R$  ranging from the average equilibrium distance  $R_{av}$  to  $R_{av} - 0.5$  Å for each molecule, where the distances shorter than or equal to the equilibrium distance tend to contribute the most to the rate constants.

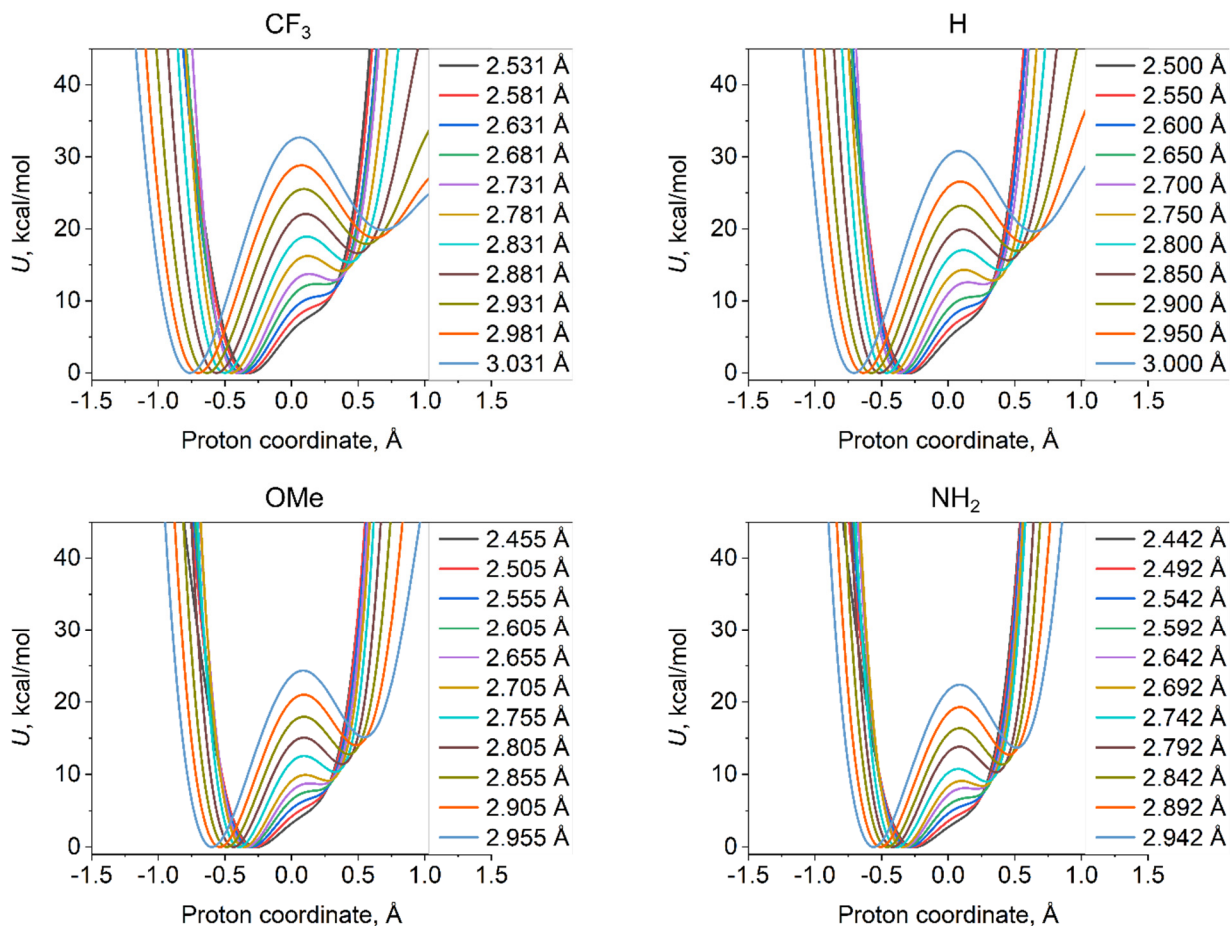

**Figure S2.** Proton potentials for the reactant structures for the range of proton donor-acceptor distances specified.

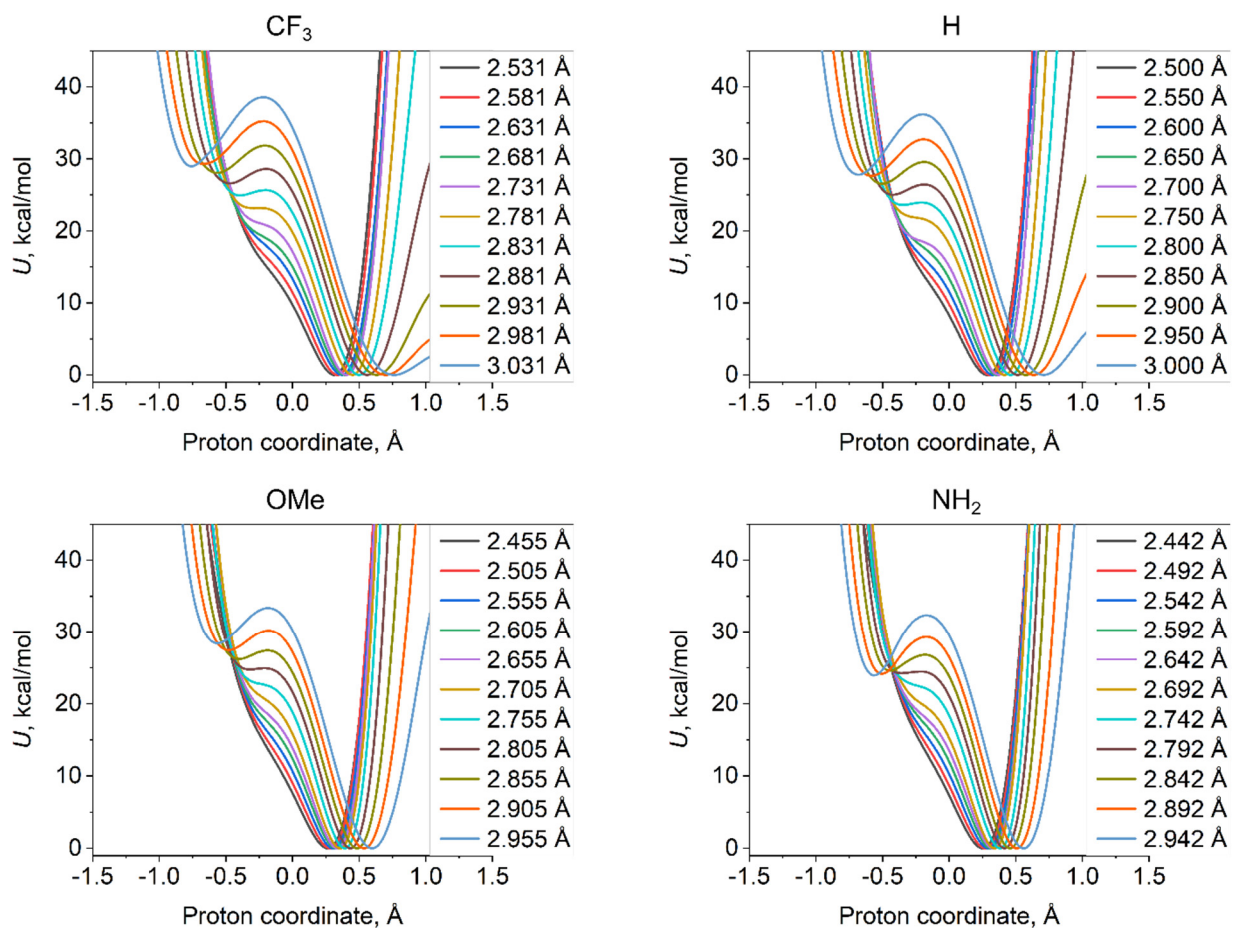

**Figure S3.** Proton potentials for the product structures for the range of proton donor-acceptor distances specified.

## Probability distribution function for proton donor-acceptor distance

The probability distribution function  $P(R)$  is an exponential function of the potential energy  $U$  of the reactant at proton donor-acceptor distance  $R$  relative to the potential energy  $U$  at the equilibrium distance  $R_0$ . Setting  $U(R_0) = 0$ , this function can be expressed as:

$$P(R) = C_N \exp\left[-\frac{U(R)}{k_B T}\right] = C_N \exp[-\beta U(R)] \quad (\text{S1})$$

where  $\beta = 1/k_B T$ . This probability distribution function was calculated directly from the electronic energies  $U(R)$  obtained from the constrained geometry optimizations of the reactant (Figure S1, left side). Due to the shape of the energy profile  $U(R)$ , it is not possible to normalize  $P(R)$ . The normalization constant  $C_N$  is not relevant when computing only relative rate constants for different oxidants, but it could vary for different substituents on the fluorenyl-benzoate molecules. For simplicity, this normalization constant is assumed to be approximately the same for all species studied in this work. The agreement between the calculated Brønsted  $\alpha$  (slope) and the experimentally measured value for the series of different substituents suggests that this assumption is reasonable.

## Total reorganization energy

### A. Inner sphere (solute) reorganization energy

To compute the inner-sphere reorganization energy associated with each molecule, we used the four-point method:

$$\lambda_{i,\text{mol}} = \frac{1}{2}(\lambda_1 + \lambda_2), \quad (\text{S2})$$

with

$$\lambda_1 = E_{\text{reactant}}(g_{\text{product}}) - E_{\text{reactant}}(g_{\text{reactant}}) \quad (\text{S3})$$

$$\lambda_2 = E_{\text{product}}(g_{\text{reactant}}) - E_{\text{product}}(g_{\text{product}}) \quad (\text{S4})$$



where  $E_A(g_B)$  denotes the energy of state A at the optimized geometry of state B. Only the electronic energies are required for the calculation of inner-sphere reorganization energies. These electronic energies were computed in the gas phase using the geometries optimized with CPCM. For PCET reactions, both the electron and the proton are on their donors for the reactant or on their acceptors for the product. Thus, the calculation of the energy  $E_A(g_B)$  when the geometry B does not correspond to the optimized geometry for state A requires the optimization of the proton on the donor or acceptor with all other nuclei fixed. The inner sphere reorganization energies obtained using the computed energies in Table S2 are given in Table S3.

**Table S2. Electronic Energies in Gas Phase at Geometries Optimized in Acetonitrile for Computing the Inner-Sphere Reorganization Energies of the Fluorenyl-Benzoates**

| Species  | Geometry | Electronic energy, a.u. |              |             |                   |
|----------|----------|-------------------------|--------------|-------------|-------------------|
|          |          | X=NH <sub>2</sub>       | X=OMe        | X=H         | X=CF <sub>3</sub> |
| Reactant | Reactant | -975.917433             | -1035.085862 | -920.557127 | -1257.625233      |
| Reactant | Product  | -975.872408             | -1035.040456 | -920.511347 | -1257.576788      |
| Product  | Product  | -975.830562             | -1034.995464 | -920.464923 | -1257.521060      |
| Product  | Reactant | -975.788168             | -1034.952777 | -920.420236 | -1257.475258      |

**Table S3. Inner-Sphere Reorganization Energies (in kcal/mol)**

| Molecule                                                                  | $\lambda_{i,mol}$ |
|---------------------------------------------------------------------------|-------------------|
| (o-Flr)(p-NH <sub>2</sub> )C <sub>6</sub> H <sub>3</sub> COO <sup>-</sup> | 27.4              |
| (o-Flr)(p-OMe)C <sub>6</sub> H <sub>3</sub> COO <sup>-</sup>              | 27.6              |
| (o-Flr)(p-H)C <sub>6</sub> H <sub>3</sub> COO <sup>-</sup>                | 28.4              |
| (o-Flr)(p-CF <sub>3</sub> )C <sub>6</sub> H <sub>3</sub> COO <sup>-</sup> | 29.6              |
| FeCp <sub>2</sub> <sup>+</sup>                                            | 0.18              |
| NAr <sub>3</sub> <sup>+</sup>                                             | 2.58              |

We also calculated the inner-sphere reorganization energy associated with the oxidants with the same four-point method. In this case, we calculated the electronic energies for both the oxidized and reduced species of the two oxidants in the gas phase at the corresponding geometries optimized in solution phase (Table S4). The resulting inner-sphere reorganization energies are given in Table S3.

**Table S4. Electronic Energies in Gas Phase at Geometries Optimized in Acetonitrile for Computing the Inner-Sphere Reorganization Energy of the Oxidants (in a.u.)**

| Species  | Geometry | FeCp <sub>2</sub> <sup>+</sup> | N(ArOMe) <sub>3</sub> <sup>•+</sup> |
|----------|----------|--------------------------------|-------------------------------------|
| Oxidized | Oxidized | -1650.487645                   | -1091.915517                        |
| Oxidized | Reduced  | -1650.747371                   | -1092.143521                        |
| Reduced  | Reduced  | -1650.747772                   | -1092.147575                        |
| Reduced  | Oxidized | -1650.487463                   | -1091.911346                        |

### B. Outer sphere (solvent) reorganization energy

To evaluate the outer sphere (solvent) reorganization energy, we used the two-sphere model because it is difficult to determine how the oxidant molecule approaches the fluorenylbenzoate molecule in terms of location, distance, and orientation. The equation used for the two-sphere model, assuming the two spheres are touching, is:

$$\lambda_s = (\Delta q)^2 \left( \frac{1}{\epsilon_{\text{opt}}} - \frac{1}{\epsilon_{\text{static}}} \right) \left( \frac{1}{2R_A} + \frac{1}{2R_B} - \frac{1}{R_A + R_B} \right). \quad (\text{S5})$$

For acetonitrile, the static dielectric constant  $\epsilon_{\text{static}}$  is 35.688, and the optical dielectric constant  $\epsilon_{\text{opt}}$  is 1.806874. The radii of the spheres were determined from the cavity volumes from CPCM calculations at the optimized structures, assuming a sphere with volume equal to the cavity volume (Table S5). The resulting calculated solvent reorganization energies  $\lambda_s$  and total reorganization energies  $\lambda$  are presented in Table S6. The total reorganization energy is ~50 kcal/mol for all systems studied.

**Table S5. Cavity Volumes and Radii of Spheres for Molecules Studied**

| Species                                                                   | Cavity volume, Å <sup>3</sup> | Radius, Å |
|---------------------------------------------------------------------------|-------------------------------|-----------|
| (o-Flr)(p-NH <sub>2</sub> )C <sub>6</sub> H <sub>3</sub> COO <sup>-</sup> | 407.382                       | 4.599     |
| (o-Flr)(p-OMe)C <sub>6</sub> H <sub>3</sub> COO <sup>-</sup>              | 416.519                       | 4.633     |
| (o-Flr)(p-H)C <sub>6</sub> H <sub>3</sub> COO <sup>-</sup>                | 386.748                       | 4.520     |
| (o-Flr)(p-CF <sub>3</sub> )C <sub>6</sub> H <sub>3</sub> COO <sup>-</sup> | 417.309                       | 4.636     |
| FeCp <sub>2</sub> <sup>+</sup>                                            | 224.200                       | 3.769     |
| N(ArOMe) <sub>3</sub> <sup>•+</sup>                                       | 456.126                       | 4.775     |

**Table S6. Total Reorganization Energy and Components (in kcal/mol)**

| Molecule                                                                   | Oxidant                             | $\lambda_{i,\text{mol}}$ | $\lambda_{i,\text{ox}}$ | $\lambda_S$ | $\lambda$ |
|----------------------------------------------------------------------------|-------------------------------------|--------------------------|-------------------------|-------------|-----------|
| (o-Flr)(p- NH <sub>2</sub> )C <sub>6</sub> H <sub>3</sub> COO <sup>-</sup> | FeCp <sub>2</sub> <sup>+</sup>      | 27.4                     | 0.18                    | 21.3        | 48.88     |
|                                                                            | N(ArOMe) <sub>3</sub> <sup>•+</sup> | 27.4                     | 2.58                    | 18.6        | 48.58     |
| (o-Flr)(p-OMe)C <sub>6</sub> H <sub>3</sub> COO <sup>-</sup>               | FeCp <sub>2</sub> <sup>+</sup>      | 27.6                     | 0.18                    | 21.2        | 48.98     |
|                                                                            | N(ArOMe) <sub>3</sub> <sup>•+</sup> | 27.6                     | 2.58                    | 18.6        | 48.78     |
| (o-Flr)(p-H)C <sub>6</sub> H <sub>3</sub> COO <sup>-</sup>                 | FeCp <sub>2</sub> <sup>+</sup>      | 28.4                     | 0.18                    | 21.4        | 49.98     |
|                                                                            | N(ArOMe) <sub>3</sub> <sup>•+</sup> | 28.4                     | 2.58                    | 18.8        | 49.78     |
| (o-Flr)(p-CF <sub>3</sub> )C <sub>6</sub> H <sub>3</sub> COO <sup>-</sup>  | FeCp <sub>2</sub> <sup>+</sup>      | 29.6                     | 0.18                    | 21.2        | 50.98     |
|                                                                            | N(ArOMe) <sub>3</sub> <sup>•+</sup> | 29.6                     | 2.58                    | 18.6        | 50.78     |

**Change in the free energy due to the substituents**

Table S7 presents the Gibbs free energies for the reactant and product structures in acetonitrile. Using the values in Table S7, we computed the  $\Delta\Delta G^0$  with respect to the (o-Flr)(p-CF<sub>3</sub>)C<sub>6</sub>H<sub>3</sub>COO<sup>-</sup> species (Table S8) to assess the change in reaction free energy  $\Delta G^0$  with the change in basicity due to the substituted functional group as:

$$\Delta\Delta G^0 = [G_{\text{product}}^0(\text{X}) - G_{\text{reactant}}^0(\text{X})] - [G_{\text{product}}^0(\text{CF}_3) - G_{\text{reactant}}^0(\text{CF}_3)] \quad (\text{S6})$$

**Table S7. Gibbs Free Energies in Acetonitrile at Geometries Optimized in Acetonitrile**

| Species  | Gibbs Free Energy, a.u. |              |             |                   |
|----------|-------------------------|--------------|-------------|-------------------|
|          | X=NH <sub>2</sub>       | X=OMe        | X=H         | X=CF <sub>3</sub> |
| Reactant | -975.774912             | -1034.925481 | -920.423656 | -1257.488767      |
| Product  | -975.610978             | -1034.758852 | -920.254392 | -1257.313078      |

**Table S8.  $\Delta G^0$  and  $\Delta\Delta G^0$  for Substituted Fluorenyl-Benzoates Reacting with FeCp<sub>2</sub><sup>+</sup>**

| Substituent X   | $\Delta\Delta G^0$ , kcal/mol | $\Delta G^0$ , kcal/mol |
|-----------------|-------------------------------|-------------------------|
| NH <sub>2</sub> | -7.38                         | -14.35                  |
| OMe             | -5.69                         | -12.66                  |
| H               | -4.03                         | -11.0                   |
| CF <sub>3</sub> | 0.00                          | -6.97                   |

## Dominant proton donor-acceptor distance

The rate constant at a given proton donor-acceptor distance  $R$  can be written as:

$$k(R) = \frac{1}{\hbar} \sqrt{\frac{\pi}{k_B T \lambda}} \sum_{\mu, \nu} P_\mu |S_{\mu\nu}(R)V^{\text{el}}|^2 \exp\left(-\frac{\Delta G_{\mu\nu}^\ddagger}{k_B T}\right), \quad (\text{S7})$$

where  $\Delta G_{\mu\nu}^\ddagger = \frac{(\Delta G_{\mu\nu}^0 + \lambda)^2}{4\lambda}$ , and the various quantities are defined in the main paper. The total rate constant  $k_{\text{PCET}}$  is given by:

$$k_{\text{PCET}} = \int_0^\infty k(R)P(R)dR. \quad (\text{S8})$$

Note that  $\Delta G_{\mu\nu}^0 = \Delta G^0 + \epsilon_\nu - \epsilon_\mu$ , where  $\epsilon_\mu$  and  $\epsilon_\nu$  are the energies of the reactant vibronic state  $\mu$  and the product vibronic state  $\nu$  relative to their respective ground vibronic states (i.e.,  $\Delta G_{00}^0 = \Delta G^0$ ).

The electronic coupling corresponding to outer-sphere electron transfer from the fluorenylbenzoates to the external oxidant is not known, but it is assumed to be independent of the proton donor-acceptor distance  $R$  and to be the same for all molecules and all oxidants in this study. In this case, it does not impact the Brønsted  $\alpha$  (slope) and simply shifts the curve along the  $\log k_{\text{PCET}}$  axis.

To analyze the results, we identify the dominant proton donor-acceptor distance, which is defined as the distance  $R$  with the greatest value of the integrand in the thermal averaging used to produce the total rate constant  $k_{\text{PCET}}$ . Thus, the dominant proton donor-acceptor distance is the maximum of  $k(R)P(R)$  (Figures S4, S5). To estimate the maximum of  $k(R)P(R)$ , we fitted  $k(R)P(R)$  to Gaussian distribution.

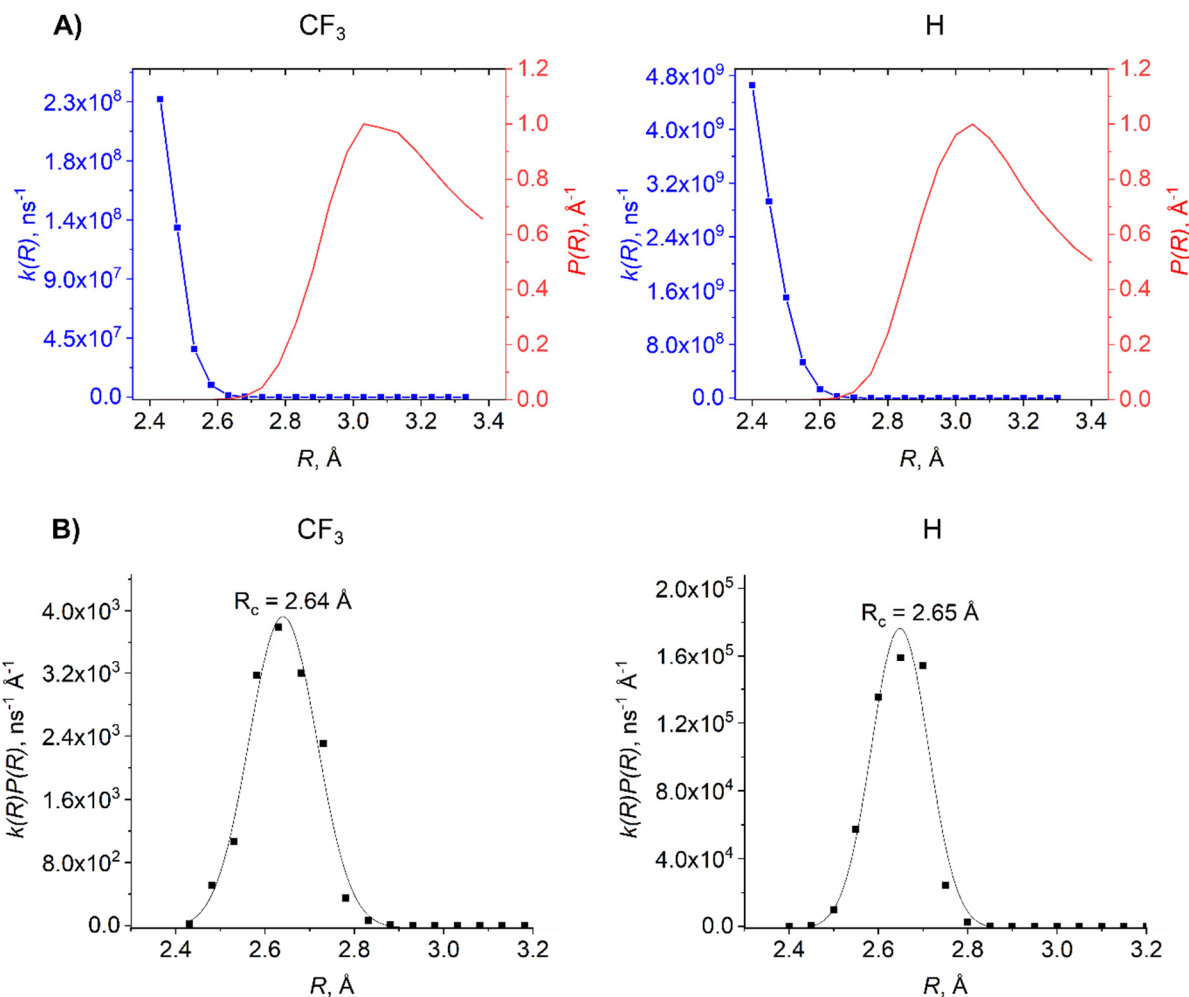

**Figure S4.** Probability distribution function  $P(R)$  and rate constant  $k(R)$  (A), and the product  $k(R)P(R)$  of these two quantities (B), computed at  $\Delta G^0 = -11.0$  kcal/mol for (o-Flr)(p-H) $\text{C}_6\text{H}_3\text{COO}^-$  and at  $\Delta G^0 = -6.97$  kcal/mol for (o-Flr)(p- $\text{CF}_3$ ) $\text{C}_6\text{H}_3\text{COO}^-$ , i.e., at the estimated  $\Delta G^0$  for the oxidant  $\text{FeCp}_2^+$ . Note that the magnitudes of the rate constants depend on constants that are not well-defined, so only the relative rate constants are meaningful.

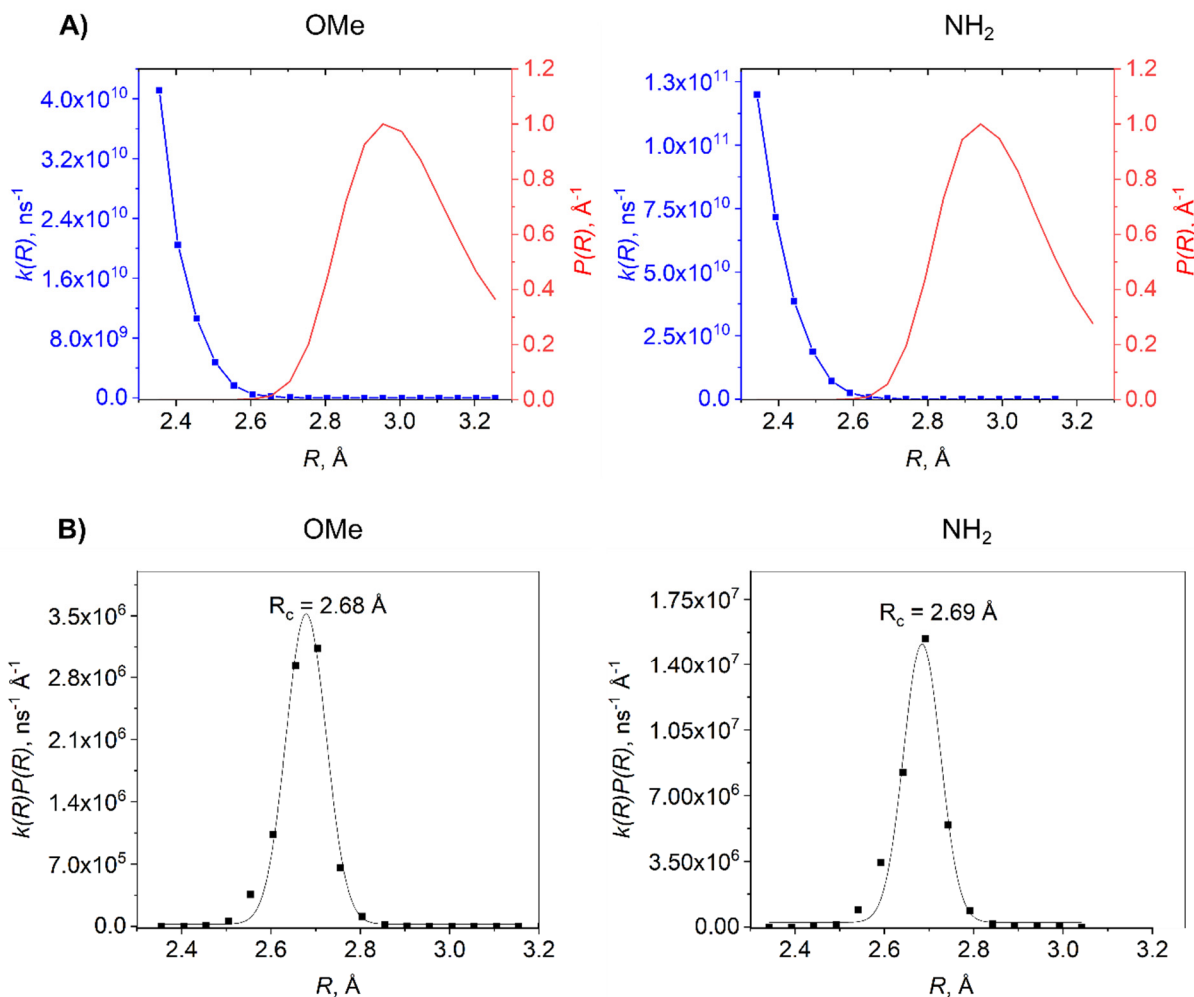

**Figure S5.** Probability distribution function  $P(R)$  and rate constant  $k(R)$  (A), and the product  $k(R)P(R)$  of these two quantities (B), computed at  $\Delta G^0 = -12.66$  kcal/mol for (o-Flr)(p-OMe) $C_6H_3COO^-$  and at  $\Delta G^0 = -14.35$  kcal/mol for (o-Flr)(p-NH<sub>2</sub>) $C_6H_3COO^-$ , i.e., at the estimated  $\Delta G^0$  for the oxidant  $FeCp_2^+$ . Note that the magnitudes of the rate constants depend on constants that are not well-defined, so only the relative rate constants are meaningful.

**Table S9. Dominant distances  $R^*$  evaluated for different oxidants with  $\lambda=30$  kcal/mol<sup>a</sup>**

| Molecule                                  | $FeCp^+Cp^+$ | $FeCp_2^+$ | $N(Ar_{OMe})_3^{*+}$ | $N(Ar_{OMe})_2(Ar_{Br})^{*+}$ |
|-------------------------------------------|--------------|------------|----------------------|-------------------------------|
| (o-Flr)(p-NH <sub>2</sub> ) $C_6H_3COO^-$ | 2.70         | 2.69       | 2.68                 | 2.69                          |
| (o-Flr)(p-OMe) $C_6H_3COO^-$              | 2.70         | 2.68       | 2.68                 | 2.68                          |
| (o-Flr)(p-H) $C_6H_3COO^-$                | 2.67         | 2.65       | 2.66                 | 2.68                          |
| (o-Flr)(p-CF <sub>3</sub> ) $C_6H_3COO^-$ | 2.67         | 2.64       | 2.64                 | 2.65                          |

<sup>a</sup> The grid along the proton donor-acceptor coordinate  $R$  was  $0.05$  Å, and the dominant distance  $R^*$  was determined as the peak of a Gaussian fit of  $k(R)P(R)$ . The value of  $R^*$  is the same for all oxidants for each molecule to within the numerical precision provided by this methodology.

## Calculated rate constants

Table S10 provides the rate constants computed with electronic coupling  $V^{\text{el}} = 1$  kcal/mol. We did not normalize  $P(R)$  due to the shape of the reactant energy profile  $U(R)$  (Figure S1). The values of  $V^{\text{el}}$  and the normalization constant  $C_N$  for  $P(R)$  are assumed to be the same for all systems studied in this work and therefore do not impact the slope but rather just shift the curve along the  $\log k_{\text{PCET}}$  axis. Thus, this table provides only estimates of relative rate constants.

**Table S10. Relative Rate Constants Computed for Different Total Reorganization Energies and Driving Forces with  $\lambda=30$  kcal/mol.<sup>a</sup>**

| $\Delta G^0$ , kcal/mol | $k_{\text{PCET}}$      |                     |                     |                     |
|-------------------------|------------------------|---------------------|---------------------|---------------------|
|                         | X=NH <sub>2</sub>      | X=OMe               | X=H                 | X=CF <sub>3</sub>   |
| -1.0                    | $2.582 \times 10^4$    | $1.105 \times 10^4$ | $8.843 \times 10^2$ | $3.065 \times 10^2$ |
| -4.0                    | $1.603 \times 10^5$    | $6.803 \times 10^4$ | $6.738 \times 10^3$ | $2.162 \times 10^3$ |
| -7.0                    | $8.579 \times 10^5$    | $3.685 \times 10^5$ | $4.696 \times 10^4$ | $1.442 \times 10^4$ |
| -9.0                    | $2.441 \times 10^6$    | $1.069 \times 10^6$ | $1.626 \times 10^5$ | $4.943 \times 10^4$ |
| -11.0                   | $6.601 \times 10^6$    | $2.971 \times 10^6$ | $5.431 \times 10^5$ | $1.654 \times 10^5$ |
| -13.0                   | $1.710 \times 10^7$    | $7.967 \times 10^6$ | $1.769 \times 10^6$ | $5.468 \times 10^5$ |
| -15.0                   | $4.303 \times 10^7$    | $2.082 \times 10^7$ | $5.710 \times 10^6$ | $1.812 \times 10^6$ |
| -18.0                   | $1.716 \times 10^8$    | $8.681 \times 10^7$ | $3.352 \times 10^7$ | $1.134 \times 10^7$ |
| -20.0                   | $4.562 \times 10^8$    | $2.292 \times 10^8$ | $1.106 \times 10^8$ | $3.960 \times 10^7$ |
| -23.0                   | $2.345 \times 10^9$    | $1.049 \times 10^9$ | $6.608 \times 10^8$ | $2.611 \times 10^8$ |
| -25.0                   | $7.783 \times 10^9$    | $3.012 \times 10^9$ | $2.127 \times 10^9$ | $8.992 \times 10^8$ |
| -27.0                   | $2.679 \times 10^{10}$ | $8.806 \times 10^9$ | $6.617 \times 10^9$ | $2.984 \times 10^9$ |

<sup>a</sup> Note that the magnitudes of the rate constants are not meaningful because they assume arbitrary values of the electronic coupling and normalization constant.

## Linear Relationship between $\Delta G^0$ and the Hammett Constant $\sigma$

Figure S6 shows the linear relationship between the PCET reaction free energy,  $\Delta G^0$ , and the Hammett parameter  $\sigma$  characterizing the electronic properties of the para-substituent.<sup>8</sup> Given the hydrogen bond between the weakly acidic fluorenyl C—H and the benzoate, the equilibrium proton donor-acceptor distance  $R_0$  is a function of the Hammett parameter  $\sigma$ : more electron-donating substituents (i.e., more negative  $\sigma$ ) lead to shorter equilibrium distances, as shown in Table 1 in the main text. The potential energy at any distance  $R$  relative to the energy at  $R_0$ ,  $U(R)$ , can also be treated as a function of  $\sigma$ . The rate constant  $k(R)$  at fixed proton donor-acceptor distance  $R$  is a function of the reaction free energy  $\Delta G^0$ , and the probability distribution function  $P(R)$  is a function of  $U(R)$ . Hence, the total rate constant  $k$  calculated in Eq. (3) or Eq. (7) in the main text is a function of  $\sigma$  and the redox potential of the oxidant,  $E_{\text{ox}}$ .

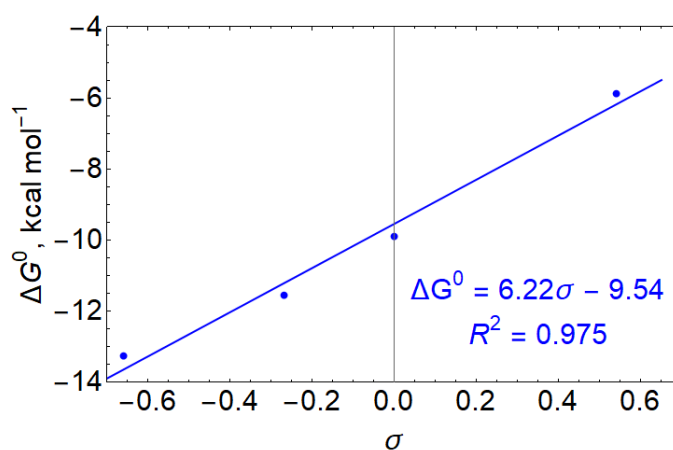

**Figure S6.** Reaction free energy,  $\Delta G^0$ , for the oxidative PCET of fluorenyl-benzoates with  $\text{FeCp}_2^+$  as the oxidant, as a function of the Hammett constant of the para-substituent on the benzoate.



## Calculated Brønsted $\alpha$

As shown in Eq. (11) in the main paper, the Brønsted  $\alpha$  for changing the oxidant with a given para-substituent (fixed  $\sigma$ ) can be evaluated from the following expression:

$$\left. \frac{\partial \log k_{\text{PCET}}}{\partial \log K_{\text{eq}}} \right|_{\sigma} = \left. \frac{\partial \log k(R^*)}{\partial \log K_{\text{eq}}} \right|_{\sigma} = \frac{1}{2} + \sum_{\mu,\nu} \omega_{\mu,\nu} \frac{\Delta G_{\mu,\nu}^0}{2\lambda} = \frac{1}{2} + \frac{\Delta G^0}{2\lambda} + \sum_{\mu,\nu} \omega_{\mu,\nu} \frac{\Delta \epsilon_{\mu,\nu}}{2\lambda} \quad (\text{S9})$$

The Brønsted  $\alpha$  computed with total reorganization energy  $\lambda = 30$  kcal/mol and the oxidant  $\text{FeCp}_2^+$ , as well as the individual components given in Eq. (S9), are presented in Table S11. Table S12 provides the Brønsted  $\alpha$  for changing substituents computed using the approximate form given in Eq. (12) and using the full PCET rate constant given in Eq. (3), as well as experimental values, for different oxidants.

**Table S11. Brønsted  $\alpha$  and Components for the  $\text{FeCp}_2^+$  Oxidant with  $\lambda=30$  kcal/mol**

| Substituent X   | $\Delta G^0$ ,<br>kcal/mol <sup>a</sup> | $\frac{1}{2} + \frac{\Delta G^0}{2\lambda}$ | $\sum_{\mu,\nu} \omega_{\mu,\nu} \frac{\Delta \epsilon_{\mu,\nu}}{2\lambda}$ <sup>b</sup> | $\left. \frac{\partial \log k(R^*)}{\partial \Delta G^0} \right _{E_{\text{ox}},\sigma}$ <sup>c</sup> |
|-----------------|-----------------------------------------|---------------------------------------------|-------------------------------------------------------------------------------------------|-------------------------------------------------------------------------------------------------------|
| NH <sub>2</sub> | -14.35                                  | 0.261                                       | 0.012                                                                                     | 0.273                                                                                                 |
| OMe             | -12.66                                  | 0.289                                       | 0.010                                                                                     | 0.299                                                                                                 |
| H               | -11.0                                   | 0.317                                       | 0.031                                                                                     | 0.348                                                                                                 |
| CF <sub>3</sub> | -6.97                                   | 0.384                                       | -0.011                                                                                    | 0.373                                                                                                 |

<sup>a</sup> These free energies are estimated for  $\text{FeCp}_2^+$ , as given in Table S8.

<sup>b</sup> These values were evaluated at the grid point corresponding to the value of  $R$  closest to the dominant value  $R^*$ , where the grid spacing along the proton donor-acceptor coordinate  $R$  was 0.05 Å.

<sup>c</sup> This column is the sum of the previous two columns, as given in Eq. (S9), and is the same as the values given in Table 1 of the main paper.

**Table S12. Brønsted  $\alpha$  computed for different oxidants with  $\lambda=30$  kcal/mol**

| Method                            | $\text{FeCp}^* \text{Cp}^+$ | $\text{FeCp}_2^+$ | $\text{N}(\text{ArOMe})_3^{*+}$ | $\text{N}(\text{ArOMe})_2 (\text{ArBr})^{*+}$ |
|-----------------------------------|-----------------------------|-------------------|---------------------------------|-----------------------------------------------|
| Full calculations <sup>a</sup>    | 0.71                        | 0.63              | 0.58                            | 0.54                                          |
| Results using Eq. 12 <sup>b</sup> | 0.48–0.52                   | 0.46–0.53         | 0.47–0.51                       | 0.47–0.51                                     |
| Experiment <sup>c</sup>           | $0.61 \pm 0.09$             | $0.58 \pm 0.10$   | $0.48 \pm 0.05$                 | $0.36 \pm 0.07$                               |

<sup>a</sup> These values correspond to the slope of a linear fit to a Brønsted plot composed of the PCET rate constants obtained from the full PCET rate constant given in Eq. (3).

<sup>b</sup> The ranges correspond to the approximate expression in Eq. (12) for the four substituents listed in Table 1 of the main paper.

---

<sup>c</sup> Experimental data from Ref.<sup>9</sup>

## Cartesian coordinates of optimized equilibrium structures

Table S13. Reactant Structure for X= H (-920.64802497  $E_h$ )

| atom | x         | y          | z         |
|------|-----------|------------|-----------|
| C    | 19.864323 | -29.134424 | 10.478145 |
| C    | 19.063292 | -28.178535 | 11.119552 |
| C    | 19.393209 | -26.817167 | 11.061904 |
| C    | 20.528171 | -26.425379 | 10.355798 |
| C    | 21.332336 | -27.386735 | 9.706260  |
| C    | 21.005100 | -28.746017 | 9.767295  |
| H    | 19.595838 | -30.185585 | 10.532790 |
| H    | 18.179730 | -28.495883 | 11.665984 |
| H    | 18.767389 | -26.081227 | 11.559854 |
| H    | 21.621014 | -29.491705 | 9.272092  |
| C    | 22.444986 | -26.691738 | 9.042268  |
| C    | 22.316972 | -25.307298 | 9.285846  |
| C    | 23.245349 | -24.410756 | 8.761706  |
| C    | 24.307712 | -24.903534 | 7.991030  |
| C    | 24.437277 | -26.279409 | 7.751818  |
| C    | 23.507679 | -27.183977 | 8.276099  |
| H    | 23.148570 | -23.343576 | 8.942187  |
| H    | 25.036998 | -24.214058 | 7.575404  |
| H    | 25.266263 | -26.645719 | 7.152961  |
| H    | 23.613639 | -28.248600 | 8.086519  |
| C    | 20.125757 | -23.992020 | 9.634516  |
| C    | 19.615419 | -24.159463 | 8.335221  |
| C    | 18.694891 | -23.266003 | 7.789575  |
| C    | 18.248230 | -22.183716 | 8.556577  |
| C    | 18.724029 | -22.023048 | 9.856840  |
| C    | 19.670613 | -22.905044 | 10.411220 |
| H    | 19.951538 | -25.006810 | 7.742639  |
| H    | 18.326934 | -23.414170 | 6.778170  |
| C    | 20.152473 | -22.613888 | 11.836724 |
| C    | 21.110667 | -25.027618 | 10.173072 |
| O    | 21.398914 | -22.671735 | 12.054307 |
| O    | 19.260184 | -22.311027 | 12.679483 |
| H    | 17.53128  | -21.47765  | 8.146691  |
| H    | 18.36578  | -21.20058  | 10.46831  |
| H    | 21.47444  | -24.65521  | 11.13772  |

**Table S14. Product Structure for X= H (-920.47896892  $E_h$ )**

| <b>atom</b> | <b>x</b>  | <b>y</b>   | <b>z</b>  |
|-------------|-----------|------------|-----------|
| C           | 20.017349 | -29.059994 | 11.030332 |
| C           | 18.994545 | -28.110613 | 11.177418 |
| C           | 19.143503 | -26.815112 | 10.672633 |
| C           | 20.339490 | -26.473199 | 10.020904 |
| C           | 21.371804 | -27.449674 | 9.859128  |
| C           | 21.211186 | -28.735369 | 10.363766 |
| H           | 19.882010 | -30.060854 | 11.428977 |
| H           | 18.075559 | -28.385684 | 11.685881 |
| H           | 18.339016 | -26.093730 | 10.780193 |
| H           | 21.988211 | -29.484947 | 10.243896 |
| C           | 22.462980 | -26.822097 | 9.104802  |
| C           | 22.067660 | -25.478420 | 8.809916  |
| C           | 22.936966 | -24.626694 | 8.106625  |
| C           | 24.176126 | -25.121276 | 7.689052  |
| C           | 24.554344 | -26.442833 | 7.972997  |
| C           | 23.699598 | -27.300328 | 8.687093  |
| H           | 22.657519 | -23.599801 | 7.892073  |
| H           | 24.855143 | -24.474644 | 7.141718  |
| H           | 25.522040 | -26.806981 | 7.641357  |
| H           | 24.009742 | -28.318006 | 8.906434  |
| C           | 19.965554 | -24.012120 | 9.243552  |
| C           | 19.713529 | -23.525233 | 7.944768  |
| C           | 18.894662 | -22.418565 | 7.727424  |
| C           | 18.295969 | -21.766841 | 8.809739  |
| C           | 18.540277 | -22.221074 | 10.103841 |
| C           | 19.381485 | -23.320364 | 10.338166 |
| H           | 20.139671 | -24.052764 | 7.097802  |
| H           | 18.715012 | -22.074803 | 6.713420  |
| C           | 19.655808 | -23.625343 | 11.780720 |
| C           | 20.760656 | -25.242189 | 9.383345  |
| O           | 20.879987 | -24.088225 | 12.119018 |
| O           | 18.846210 | -23.420846 | 12.668354 |
| H           | 17.652299 | -20.908214 | 8.648443  |
| H           | 18.101732 | -21.712747 | 10.955515 |
| H           | 21.449477 | -24.206237 | 11.339827 |

**Table S15. Reactant Structure for X= CF<sub>3</sub> (-1257.70956393 E<sub>h</sub>)**

| atom | x         | y          | z         |
|------|-----------|------------|-----------|
| C    | 19.876413 | -29.141771 | 10.486446 |
| C    | 19.084276 | -28.192525 | 11.148148 |
| C    | 19.418958 | -26.831737 | 11.107655 |
| C    | 20.549872 | -26.435430 | 10.398030 |
| C    | 21.345183 | -27.389399 | 9.727746  |
| C    | 21.012949 | -28.747955 | 9.771856  |
| H    | 19.604236 | -30.192524 | 10.528118 |
| H    | 18.203988 | -28.514328 | 11.697082 |
| H    | 18.800390 | -26.100977 | 11.621896 |
| H    | 21.621737 | -29.488789 | 9.261003  |
| C    | 22.455231 | -26.689233 | 9.064555  |
| C    | 22.335944 | -25.308083 | 9.328637  |
| C    | 23.262646 | -24.406916 | 8.810052  |
| C    | 24.316337 | -24.893031 | 8.023432  |
| C    | 24.438065 | -26.265774 | 7.763819  |
| C    | 23.509398 | -27.174430 | 8.282593  |
| H    | 23.172256 | -23.342219 | 9.007239  |
| H    | 25.044928 | -24.200647 | 7.611660  |
| H    | 25.260595 | -26.626720 | 7.153014  |
| H    | 23.609591 | -28.236531 | 8.076946  |
| C    | 20.151552 | -23.995788 | 9.706046  |
| C    | 19.630074 | -24.156786 | 8.412370  |
| C    | 18.709585 | -23.251254 | 7.888426  |
| C    | 18.275291 | -22.164897 | 8.661574  |
| C    | 18.767365 | -22.016677 | 9.952315  |
| C    | 19.713521 | -22.909758 | 10.489404 |
| H    | 19.952692 | -25.001334 | 7.812571  |
| C    | 18.187784 | -23.406264 | 6.490737  |
| C    | 20.215175 | -22.636335 | 11.911660 |
| C    | 21.136929 | -25.036990 | 10.229523 |
| O    | 21.467533 | -22.614160 | 12.083434 |
| O    | 19.325862 | -22.432648 | 12.783994 |
| H    | 17.557832 | -21.454171 | 8.263835  |
| H    | 18.418811 | -21.194790 | 10.569102 |
| H    | 21.507045 | -24.676805 | 11.195942 |
| F    | 18.529353 | -24.587306 | 5.918325  |
| F    | 18.648722 | -22.427849 | 5.653511  |
| F    | 16.827279 | -23.324919 | 6.432262  |

**Table S16. Product Structure for X= CF<sub>3</sub> (-1257.53543967 E<sub>h</sub>)**

| <b>atom</b> | <b>x</b>  | <b>y</b>   | <b>z</b>  |
|-------------|-----------|------------|-----------|
| C           | 20.038639 | -29.091649 | 11.064327 |
| C           | 19.016873 | -28.143491 | 11.223264 |
| C           | 19.161246 | -26.846133 | 10.721871 |
| C           | 20.352417 | -26.501631 | 10.062696 |
| C           | 21.383259 | -27.477314 | 9.887769  |
| C           | 21.226996 | -28.764540 | 10.388760 |
| H           | 19.906905 | -30.093983 | 11.460327 |
| H           | 18.101993 | -28.420621 | 11.737789 |
| H           | 18.356113 | -26.126856 | 10.837798 |
| H           | 22.002776 | -29.513695 | 10.259291 |
| C           | 22.467992 | -26.847381 | 9.125773  |
| C           | 22.071292 | -25.502565 | 8.839015  |
| C           | 22.935142 | -24.647923 | 8.132706  |
| C           | 24.170116 | -25.141925 | 7.702061  |
| C           | 24.549163 | -26.464806 | 7.976941  |
| C           | 23.700142 | -27.324756 | 8.695318  |
| H           | 22.657200 | -23.619030 | 7.925890  |
| H           | 24.844892 | -24.493335 | 7.151988  |
| H           | 25.513456 | -26.828511 | 7.635220  |
| H           | 24.011536 | -28.343403 | 8.907852  |
| C           | 19.976235 | -24.038117 | 9.302267  |
| C           | 19.726118 | -23.534910 | 8.009573  |
| C           | 18.915724 | -22.419953 | 7.817250  |
| C           | 18.319408 | -21.774954 | 8.907924  |
| C           | 18.564181 | -22.251193 | 10.190056 |
| C           | 19.400257 | -23.357908 | 10.404325 |
| H           | 20.147943 | -24.050467 | 7.155445  |
| C           | 18.641429 | -21.902134 | 6.429149  |
| C           | 19.671113 | -23.692303 | 11.844832 |
| C           | 20.769500 | -25.270031 | 9.424997  |
| O           | 20.907078 | -24.114479 | 12.182913 |
| O           | 18.839859 | -23.542456 | 12.720843 |
| H           | 17.682343 | -20.909566 | 8.761389  |
| H           | 18.126673 | -21.752594 | 11.047351 |
| H           | 21.493630 | -24.185813 | 11.410981 |
| F           | 19.351394 | -22.545494 | 5.473873  |
| F           | 18.936485 | -20.578899 | 6.317004  |
| F           | 17.327590 | -22.026592 | 6.093170  |

**Table S17. Reactant Structure for X= OMe (-1035.17909873  $E_h$ )**

| <b>atom</b> | <b>x</b>  | <b>y</b>   | <b>z</b>  |
|-------------|-----------|------------|-----------|
| C           | 19.850376 | -29.124173 | 10.450546 |
| C           | 19.057876 | -28.176804 | 11.115021 |
| C           | 19.398310 | -26.817135 | 11.087796 |
| C           | 20.534813 | -26.417831 | 10.388137 |
| C           | 21.330182 | -27.370617 | 9.715148  |
| C           | 20.992789 | -28.728490 | 9.746407  |
| H           | 19.573852 | -30.174212 | 10.481922 |
| H           | 18.172776 | -28.499706 | 11.655717 |
| H           | 18.779232 | -26.087734 | 11.603554 |
| H           | 21.602137 | -29.467450 | 9.233251  |
| C           | 22.446226 | -26.669039 | 9.064089  |
| C           | 22.328546 | -25.289324 | 9.339042  |
| C           | 23.262155 | -24.387993 | 8.832315  |
| C           | 24.319069 | -24.870990 | 8.048141  |
| C           | 24.438560 | -26.242183 | 7.778264  |
| C           | 23.503797 | -27.151574 | 8.284667  |
| H           | 23.173535 | -23.324392 | 9.036740  |
| H           | 25.052215 | -24.177562 | 7.646033  |
| H           | 25.263725 | -26.600879 | 7.169588  |
| H           | 23.601947 | -28.212528 | 8.071617  |
| C           | 20.152288 | -23.960244 | 9.737670  |
| C           | 19.618834 | -24.125620 | 8.444401  |
| C           | 18.697388 | -23.216683 | 7.922695  |
| C           | 18.278176 | -22.130555 | 8.708143  |
| C           | 18.785032 | -21.984861 | 9.991404  |
| C           | 19.736100 | -22.874654 | 10.533161 |
| H           | 19.940761 | -24.978548 | 7.857876  |
| O           | 18.147745 | -23.300994 | 6.670940  |
| C           | 20.243436 | -22.580429 | 11.948585 |
| C           | 21.129391 | -25.022349 | 10.238726 |
| O           | 21.459892 | -22.827517 | 12.208641 |
| O           | 19.403502 | -22.080943 | 12.752548 |
| H           | 17.560305 | -21.424680 | 8.301433  |
| H           | 18.448900 | -21.158548 | 10.608924 |
| H           | 21.499642 | -24.674594 | 11.210355 |
| C           | 18.538587 | -24.384642 | 5.824801  |
| H           | 17.989237 | -24.246652 | 4.893334  |
| H           | 18.270051 | -25.350356 | 6.267704  |
| H           | 19.615132 | -24.360254 | 5.621625  |

**Table S18. Product Structure for X= OMe (-1035.01192224  $E_h$ )**

| atom | x         | y          | z         |
|------|-----------|------------|-----------|
| C    | 20.003338 | -29.102597 | 10.986863 |
| C    | 18.989988 | -28.149943 | 11.173414 |
| C    | 19.148156 | -26.838789 | 10.714075 |
| C    | 20.343537 | -26.485997 | 10.067228 |
| C    | 21.367573 | -27.464310 | 9.867011  |
| C    | 21.197606 | -28.765299 | 10.326995 |
| H    | 19.860909 | -30.115711 | 11.350523 |
| H    | 18.071578 | -28.434676 | 11.677543 |
| H    | 18.353582 | -26.111902 | 10.853885 |
| H    | 21.967564 | -29.516940 | 10.178179 |
| C    | 22.462286 | -26.818213 | 9.133200  |
| C    | 22.076949 | -25.461450 | 8.888866  |
| C    | 22.948892 | -24.591157 | 8.212125  |
| C    | 24.182424 | -25.079656 | 7.771537  |
| C    | 24.551654 | -26.413299 | 8.006614  |
| C    | 23.693269 | -27.290130 | 8.692782  |
| H    | 22.674073 | -23.555947 | 8.034772  |
| H    | 24.863942 | -24.419164 | 7.244265  |
| H    | 25.515022 | -26.772597 | 7.657585  |
| H    | 23.996391 | -28.317619 | 8.872477  |
| C    | 19.976970 | -24.000074 | 9.364348  |
| C    | 19.698198 | -23.534024 | 8.064884  |
| C    | 18.872778 | -22.422462 | 7.858000  |
| C    | 18.305556 | -21.760221 | 8.961152  |
| C    | 18.586103 | -22.204585 | 10.241174 |
| C    | 19.431097 | -23.307641 | 10.475418 |
| H    | 20.103907 | -24.082757 | 7.224866  |
| O    | 18.554789 | -21.923068 | 6.638221  |
| C    | 19.735145 | -23.591423 | 11.908861 |
| C    | 20.773932 | -25.235997 | 9.474605  |
| O    | 20.906048 | -24.193176 | 12.223372 |
| O    | 18.998513 | -23.257360 | 12.823872 |
| H    | 17.663073 | -20.902647 | 8.792638  |
| H    | 18.168995 | -21.684226 | 11.095984 |
| H    | 21.423442 | -24.411405 | 11.428872 |
| C    | 19.097619 | -22.545152 | 5.465041  |
| H    | 18.715737 | -21.966174 | 4.625044  |
| H    | 18.759532 | -23.582973 | 5.380475  |
| H    | 20.191505 | -22.506527 | 5.472324  |



**Table S19. Reactant Structure for X= NH<sub>2</sub> (-976.01488810 E<sub>h</sub> )**

| atom | x         | y          | z         |
|------|-----------|------------|-----------|
| C    | 19.859654 | -29.141085 | 10.418643 |
| C    | 19.057588 | -28.193444 | 11.071251 |
| C    | 19.396146 | -26.833279 | 11.045161 |
| C    | 20.540359 | -26.433039 | 10.358488 |
| C    | 21.345436 | -27.386398 | 9.697699  |
| C    | 21.009952 | -28.744831 | 9.727801  |
| H    | 19.584425 | -30.191518 | 10.448831 |
| H    | 18.166366 | -28.516619 | 11.601694 |
| H    | 18.769373 | -26.103775 | 11.551432 |
| H    | 21.626794 | -29.483808 | 9.223626  |
| C    | 22.468125 | -26.684459 | 9.058750  |
| C    | 22.344328 | -25.304263 | 9.329119  |
| C    | 23.282861 | -24.402840 | 8.831466  |
| C    | 24.350089 | -24.885763 | 8.061334  |
| C    | 24.475369 | -26.257387 | 7.796141  |
| C    | 23.535952 | -27.167044 | 8.293388  |
| H    | 23.189903 | -23.338852 | 9.032003  |
| H    | 25.086783 | -24.191924 | 7.666417  |
| H    | 25.308468 | -26.616092 | 7.198343  |
| H    | 23.638338 | -28.228364 | 8.084009  |
| C    | 20.161792 | -23.975641 | 9.699986  |
| C    | 19.633124 | -24.145533 | 8.412052  |
| C    | 18.706677 | -23.250171 | 7.859383  |
| C    | 18.288786 | -22.159738 | 8.645497  |
| C    | 18.790945 | -22.003184 | 9.932017  |
| C    | 19.740482 | -22.881593 | 10.489491 |
| H    | 19.951128 | -25.001593 | 7.820562  |
| N    | 18.255134 | -23.403761 | 6.543875  |
| C    | 20.240183 | -22.571195 | 11.902223 |
| C    | 21.134117 | -25.037220 | 10.213352 |
| O    | 21.442433 | -22.860235 | 12.189910 |
| O    | 19.413123 | -22.015374 | 12.683998 |
| H    | 17.571648 | -21.446198 | 8.246831  |
| H    | 18.448361 | -21.172690 | 10.540619 |
| H    | 21.492235 | -24.687108 | 11.188975 |
| H    | 18.309169 | -24.345777 | 6.176589  |
| H    | 17.357489 | -22.980164 | 6.344005  |

**Table S20. Product Structure for X= NH<sub>2</sub> (-975.85044544 E<sub>h</sub>)**

| atom | x         | y          | z         |
|------|-----------|------------|-----------|
| C    | 20.012183 | -29.111014 | 10.986300 |
| C    | 18.997528 | -28.158554 | 11.167810 |
| C    | 19.154469 | -26.849432 | 10.702429 |
| C    | 20.349331 | -26.498860 | 10.053366 |
| C    | 21.375487 | -27.476460 | 9.859716  |
| C    | 21.206753 | -28.775434 | 10.326108 |
| H    | 19.870707 | -30.122518 | 11.354845 |
| H    | 18.079428 | -28.442001 | 11.673305 |
| H    | 18.360899 | -26.120968 | 10.839886 |
| H    | 21.977943 | -29.526780 | 10.182075 |
| C    | 22.470009 | -26.831747 | 9.124323  |
| C    | 22.082016 | -25.476807 | 8.873327  |
| C    | 22.951203 | -24.608570 | 8.190611  |
| C    | 24.185920 | -25.096541 | 7.752791  |
| C    | 24.558518 | -26.427980 | 7.995692  |
| C    | 23.702083 | -27.303244 | 8.686360  |
| H    | 22.671821 | -23.575752 | 8.006388  |
| H    | 24.865775 | -24.437746 | 7.221196  |
| H    | 25.522752 | -26.786913 | 7.648610  |
| H    | 24.007305 | -28.329298 | 8.870848  |
| C    | 19.973164 | -24.019040 | 9.328368  |
| C    | 19.674774 | -23.591068 | 8.028930  |
| C    | 18.838048 | -22.484947 | 7.777352  |
| C    | 18.284637 | -21.800241 | 8.881200  |
| C    | 18.586010 | -22.207249 | 10.169167 |
| C    | 19.437865 | -23.297983 | 10.433800 |
| H    | 20.067988 | -24.155111 | 7.188676  |
| N    | 18.522845 | -22.122197 | 6.488778  |
| C    | 19.765835 | -23.526405 | 11.865288 |
| C    | 20.778125 | -25.250244 | 9.456022  |
| O    | 20.903050 | -24.192933 | 12.183863 |
| O    | 19.083236 | -23.099473 | 12.786881 |
| H    | 17.632303 | -20.947639 | 8.717458  |
| H    | 18.179431 | -21.659978 | 11.012478 |
| H    | 21.380992 | -24.486471 | 11.388293 |
| H    | 19.113215 | -22.454423 | 5.739257  |
| H    | 18.129614 | -21.204313 | 6.335475  |

## References

1. Becke, A. D., Density-Functional Thermochemistry. Iii. The Role of Exact Exchange. *J. Chem. Phys.* **1993**, *98*, 5648-5652.
2. Lee, C.; Yang, W.; Parr, R. G., Development of the Colle-Salvetti Correlation-Energy Formula into a Functional of the Electron Density. *Phys. Rev. B* **1988**, *37*, 785-789.
3. Hehre, W. J.; Ditchfield, R.; Pople, J. A., Self-Consistent Molecular Orbital Methods. Xii. Further Extensions of Gaussian—Type Basis Sets for Use in Molecular Orbital Studies of Organic Molecules. *J. Chem. Phys.* **1972**, *56*, 2257-2261.
4. Clark, T.; Chandrasekhar, J.; Spitznagel, G. W.; Schleyer, P. V. R., Efficient Diffuse Function-Augmented Basis Sets for Anion Calculations. Iii. The 3-21+G Basis Set for First-Row Elements, Li–F. *J. Comput. Chem.* **1983**, *4*, 294-301.
5. Hariharan, P. C.; Pople, J. A., The Influence of Polarization Functions on Molecular Orbital Hydrogenation Energies. *Theor. Chim. Acta* **1973**, *28*, 213-222.
6. Frisch, M. J.; Trucks, G. W.; Schlegel, H. B.; Scuseria, G. E.; Robb, M. A.; Cheeseman, J. R.; Scalmani, G.; Barone, V.; Petersson, G. A.; Nakatsuji, H.; Li, X.; Caricato, M.; Marenich, A.; Bloino, J.; Janesko, B. G.; Gomperts, R.; Mennucci, B.; Hratchian, H. P.; Ortiz, J. V.; Izmaylov, A. F.; Sonnenberg, J. L.; Williams-Young, D.; Ding, F.; Lipparini, F.; Egidi, F.; Goings, J.; Peng, B.; Petrone, A.; Henderson, T.; Ranasinghe, D.; Zakrzewski, V. G.; Gao, J.; Rega, N.; Zheng, G.; Liang, W.; Hada, M.; Ehara, M.; Toyota, K.; Fukuda, R.; Hasegawa, J.; Ishida, M.; Nakajima, T.; Honda, Y.; Kitao, O.; Nakai, H.; Vreven, T.; Throssell, K.; Jr, J. A. M.; Peralta, J. E.; Ogliaro, F.; Bearpark, M.; Heyd, J. J.; Brothers, E.; Kudin, K. N.; Staroverov, V. N.; Keith, T.; Kobayashi, R.; Normand, J.; Raghavachari, K.; Rendell, A.; Burant, J. C.; Iyengar, S. S.; Tomasi, J.; Cossi, M.; Millam, J. M.; Klene, M.; Adamo, C.; Cammi, R.; Ochterski, J. W.; Martin, R. L.; Morokuma, K.; Farkas, O.; Foresman, J. B.; Fox, D. J., Gaussian 09 Revision D.01. **2013**.
7. Miertuš, S.; Scrocco, E.; Tomasi, J., Electrostatic Interaction of a Solute with a Continuum. A Direct Utilizaion of Ab Initio Molecular Potentials for the Prevision of Solvent Effects. *Chem. Phys.* **1981**, *55*, 117-129.
8. Hansch, C.; Leo, A.; Taft, R. W., A Survey of Hammett Substituent Constants and Resonance and Field Parameters. *Chem. Rev.* **1991**, *91*, 165-195.
9. Darcy, J. W.; Kolmar, S. S.; Mayer, J. M., Transition State Asymmetry in C-H Bond Cleavage by Proton-Coupled Electron Transfer. *J. Am. Chem. Soc.* **2019**, *141*, 10777-10787.
